# Supplementary material for: Continuity of care during severe civil unrest with a model of community-based HIV care: a retrospective cohort study from Haiti
Source: PubMed Central journal article supplement — Lancet Reg Health Am. 2024 Aug 12;37:100847. doi: 10.1016/j.lana.2024.100847 (PMC11369392; doi:10.1016/j.lana.2024.100847), 2024-08-12
Supplement: mmc1.pdf [file mmc1.pdf]

**Supplementary Table 1. Predictors of Attending at Least One Community Visit (Prevalence Ratios)**

| DV: Attended $\geq 1$ Community Visit (n = 9,659) |                      |              |          |                        |              |          |
|---------------------------------------------------|----------------------|--------------|----------|------------------------|--------------|----------|
| Variable                                          | Univariable Analysis |              |          | Multivariable Analysis |              |          |
|                                                   | PR                   | 95% CI       | p-value  | PR                     | 95% CI       | p-value  |
| Age, decades                                      | 1.04                 | (1.03, 1.05) | < 0.0001 | 0.99                   | (0.98, 1.01) | 0.34     |
| Female Sex at Birth                               | 0.93                 | (0.91, 0.96) | < 0.0001 | 0.95                   | (0.92, 0.98) | 0.0003   |
| Secondary Education or Higher                     | 1.04                 | (1.02, 1.07) | 0.002    | 1.03                   | (1.00, 1.06) | 0.025    |
| Income > \$1 USD/day                              | 1.10                 | (1.06, 1.14) | < 0.0001 | 1.10                   | (1.06, 1.14) | < 0.0001 |
| Married/Cohabiting                                | 1.02                 | (0.99, 1.05) | 0.12     | 0.99                   | (0.97, 1.02) | 0.68     |
| Residence Area                                    |                      |              |          |                        |              |          |
| Carrefour/Gressier                                |                      | Reference    |          |                        | Reference    |          |
| Delmas                                            | 0.85                 | (0.82, 0.89) | < 0.0001 | 0.85                   | (0.82, 0.89) | < 0.0001 |
| Pétion-Ville                                      | 0.83                 | (0.78, 0.87) | < 0.0001 | 0.82                   | (0.78, 0.87) | < 0.0001 |
| Croix-Des-Bouquets                                | 0.72                 | (0.69, 0.75) | < 0.0001 | 0.73                   | (0.70, 0.76) | < 0.0001 |
| Downtown PAP                                      | 0.81                 | (0.78, 0.83) | < 0.0001 | 0.83                   | (0.80, 0.86) | < 0.0001 |
| Outside PAP metropolitan area                     | 0.48                 | (0.45, 0.51) | < 0.0001 | 0.47                   | (0.44, 0.50) | < 0.0001 |
| Time on ART, years                                | 1.03                 | (1.03, 1.03) | < 0.0001 | 1.03                   | (1.03, 1.04) | < 0.0001 |
| N                                                 |                      | 18,625       |          |                        | 18,625       |          |
| Model                                             |                      | Poisson      |          |                        | Poisson      |          |

Abbreviations: ART, antiretroviral therapy; CI, confidence interval; DV: dependent variable; PAP, Port-au-Prince; PR: prevalence ratio; USD, United States Dollar.

**Supplementary Table 2. Sensitivity Analysis for Predictors of Late Status**

| Variable                      | DV: Late, 21-365 days<br>(n=2,610) |              |          | DV: Late, 41-365 days<br>(n=1,940) |              |          | DV: Number of days late |                 |          |
|-------------------------------|------------------------------------|--------------|----------|------------------------------------|--------------|----------|-------------------------|-----------------|----------|
|                               | aOR                                | 95 % CI      | p-value  | aOR                                | CI           | p-value  | Coefficient             | 95% CI          | p-value  |
| Age, decades                  | 0.92                               | (0.89, 0.95) | < 0.0001 | 0.91                               | (0.87, 0.94) | < 0.0001 | -3.16                   | (-5.42, -0.91)  | 0.006    |
| Female Sex at Birth           | 1.07                               | (0.98, 1.16) | 0.15     | 1.04                               | (0.94, 1.14) | 0.49     | -0.97                   | (-6.58, 4.63)   | 0.73     |
| Secondary Education or Higher | 1.00                               | (0.92, 1.09) | 0.98     | 1.00                               | (0.90, 1.10) | 0.93     | -8.52                   | (-14.09, -2.94) | 0.003    |
| Income > \$1 USD/day          | 0.94                               | (0.84, 1.06) | 0.32     | 0.99                               | (0.86, 1.13) | 0.84     | -5.70                   | (-13.31, 1.90)  | 0.14     |
| Married/Cohabiting            | 1.22                               | (1.12, 1.33) | < 0.0001 | 1.20                               | (1.09, 1.33) | 0.0002   | 2.23                    | (-3.35, 7.81)   | 0.43     |
| Residence Area                |                                    |              |          |                                    |              |          |                         |                 |          |
| Carrefour/Gressier            |                                    | Reference    |          |                                    | Reference    |          |                         | Reference       |          |
| Delmas                        | 1.03                               | (0.89, 1.20) | 0.69     | 0.94                               | (0.79, 1.12) | 0.49     | -10.69                  | (-19.99, -1.39) | 0.024    |
| Pétion-Ville                  | 0.96                               | (0.80, 1.16) | 0.67     | 0.89                               | (0.72, 1.10) | 0.27     | -14.22                  | (-25.55, -2.90) | 0.014    |
| Croix-Des-Bouquets            | 1.12                               | (0.98, 1.28) | 0.09     | 1.00                               | (0.86, 1.16) | 0.99     | -9.65                   | (-18.01, -1.28) | 0.024    |
| Downtown PAP                  | 0.96                               | (0.84, 1.10) | 0.56     | 0.94                               | (0.81, 1.09) | 0.39     | 7.47                    | (-0.56, 15.50)  | 0.07     |
| Outside PAP metropolitan area | 1.93                               | (1.68, 2.21) | < 0.0001 | 1.97                               | (1.69, 2.29) | < 0.0001 | 27.86                   | (18.45, 37.27)  | < 0.0001 |
| Time on ART, years            | 0.96                               | (0.95, 0.97) | < 0.0001 | 0.95                               | (0.94, 0.96) | < 0.0001 | -2.41                   | (-3.04, -1.78)  | < 0.0001 |
| N                             |                                    | 17,126       |          |                                    | 17,126       |          |                         | 17,126          |          |
| Model                         |                                    | Logistic     |          |                                    | Logistic     |          |                         | Linear          |          |

Abbreviations: aOR: adjusted odds ratio; ART, antiretroviral therapy; CI, confidence interval; DV: dependent variable; PAP, Port-au-Prince; USD, United States Dollar.
